# Supplementary material for: The IL-33/ST2 Axis Promotes Post-COVID-19 Pulmonary Fibrosis Through β-catenin/PPAR-γ-mediated Epithelial-Mesenchymal Transition
Source: Research Square preprint supplement (doi:10.21203/rs.3.rs-7024312/v1), 2025-09-09

**Additional files**

**Table. S1 Baseline characteristics of patients providing serum samples.**

|  | **Control (n=25)** | **COVID-19 (n=28)** | **PCPF (n=26)** |
| --- | --- | --- | --- |
| **Sex（Male/Female）** | **15/10** | **16/12** | **16/10** |
| **Age (Mean±SD)** | **37.5±8.1** | **46.9±11.3** | **53.5±14.7** |


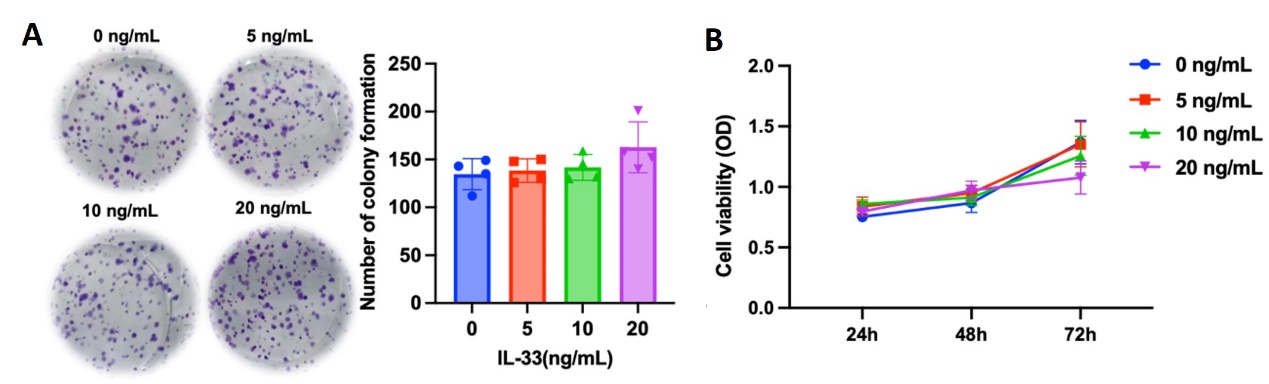


**Figure. S1 IL-33 does not alter proliferative capacity of A549 cells.** (A) Colony formation assay following 48 h treatment with graded concentrations of exogenous recombinant IL-33 protein. (B) Cell viability assessed by CCK-8 assay. ns=not significant (P>0.05, one-way ANOVA).


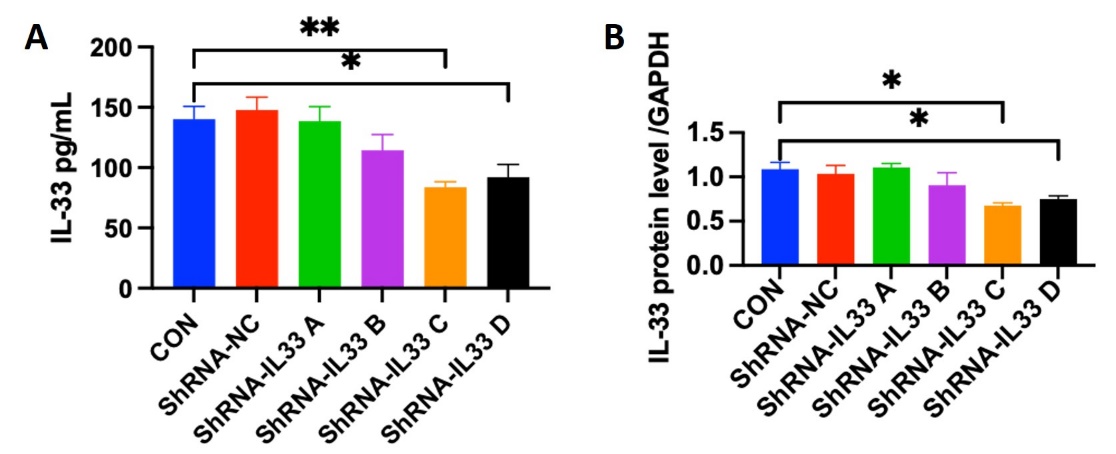


**Figure. S2 shRNA-mediated stable knockdown A549 cell lines were established.** (A) IL-33 quantified by ELISA. (B) Quantification of IL-33 protein expression. Significance denoted as *P<0.05, **P<0.01.

**Supplementary file of the Gels and Blots image(s) with markers:**

Protein molecular weights were determined using pre-stained markers (Yamei™ WJ103).

Fig.2E


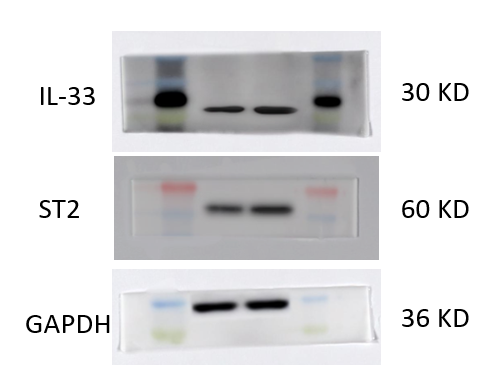


Fig.3E


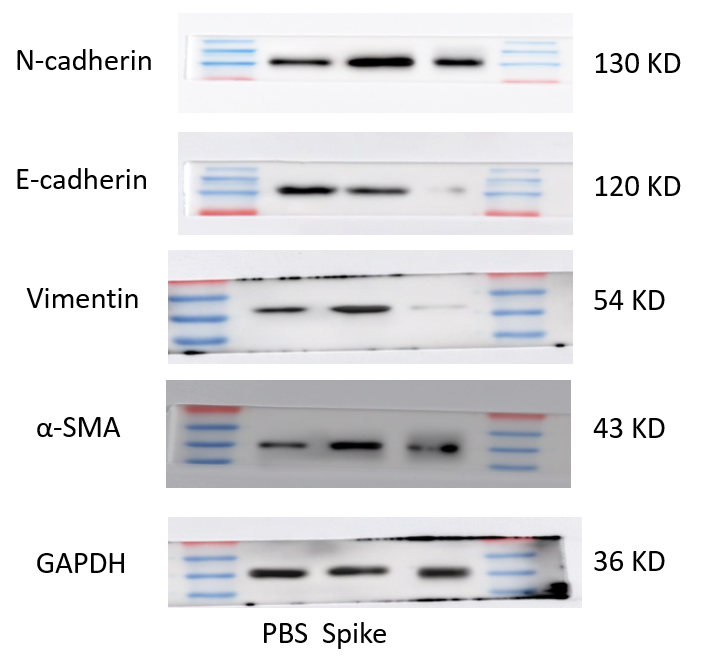


Fig.4C


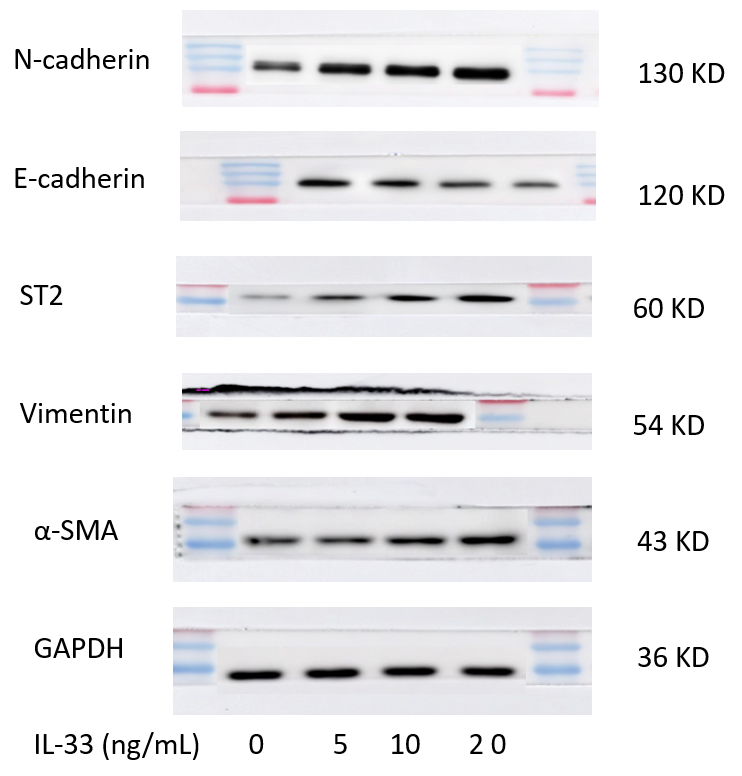


Fig.5B


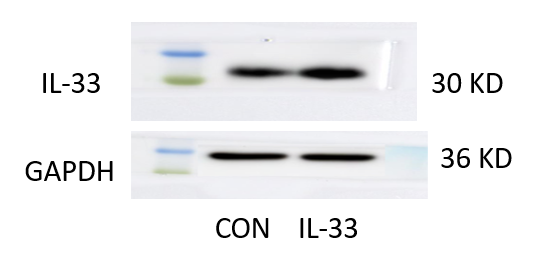


Fig.5E


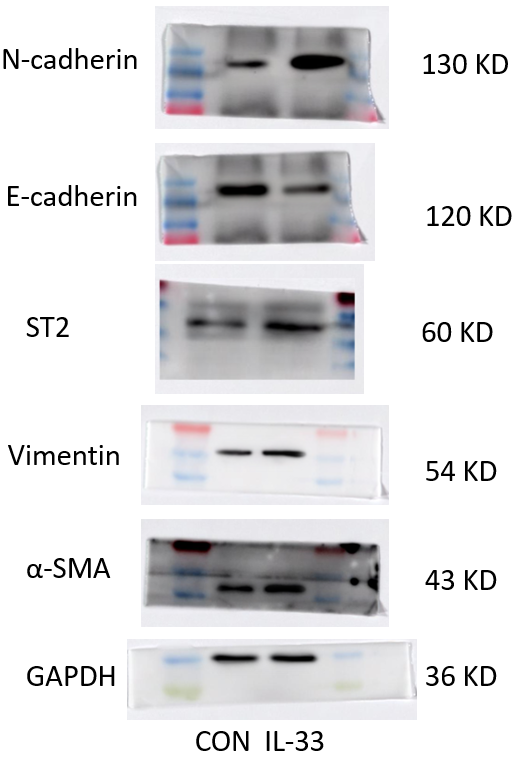


Fig.6B


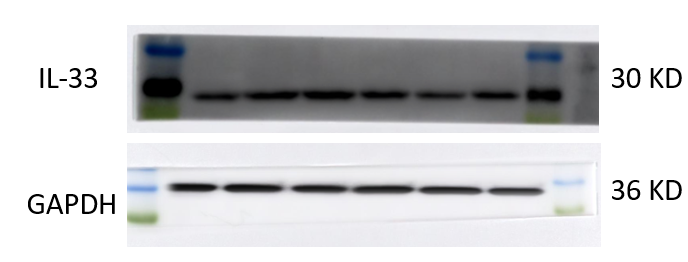


Fig.6C


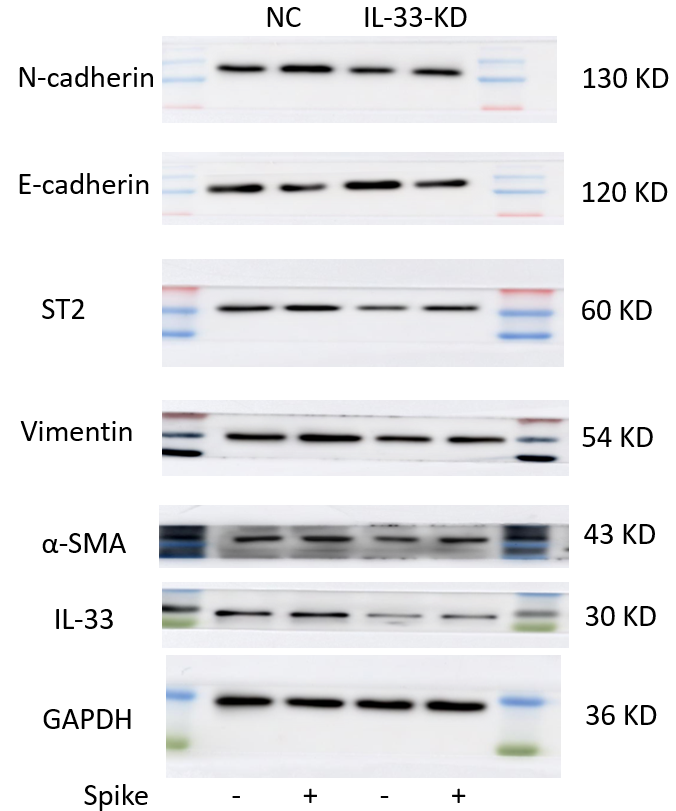


Fig.7A


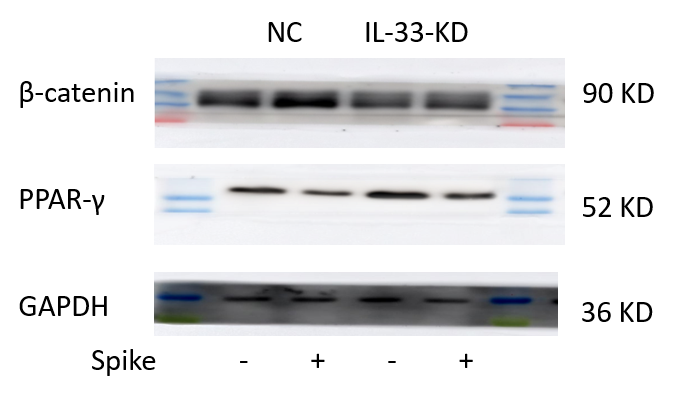


Fig.7B


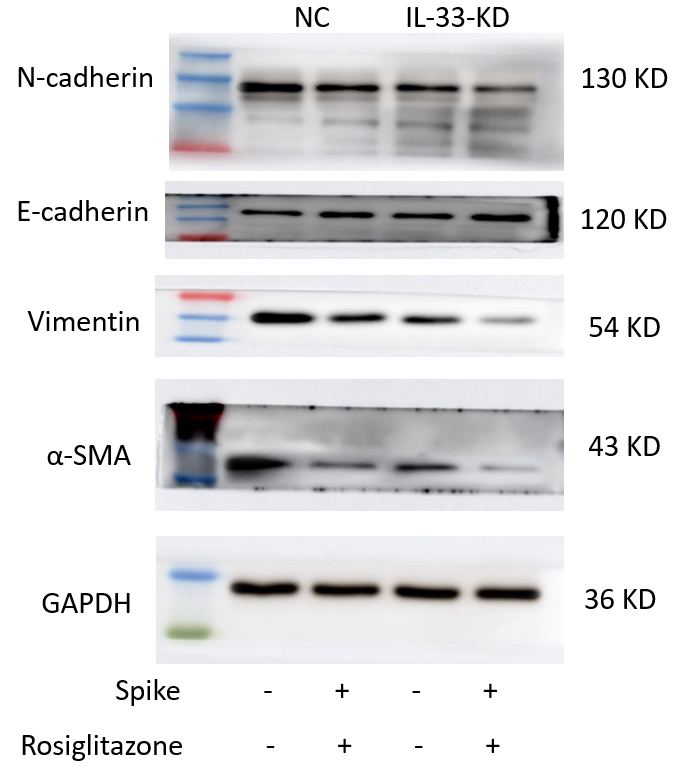

Supplement: Supplementary file 1 [file e4b2f361c86503e9a3800bf1.docx]
